# Supplementary material
Source: Springer Nature journal article supplement (https://www.springermedizin.de/resource/supplementary/12889_2009_2120_MOESM2_ESM.pdf/9484632)

## Reasons to get circumcised

■ Youth (N=177)   ■ Adults (N=251)

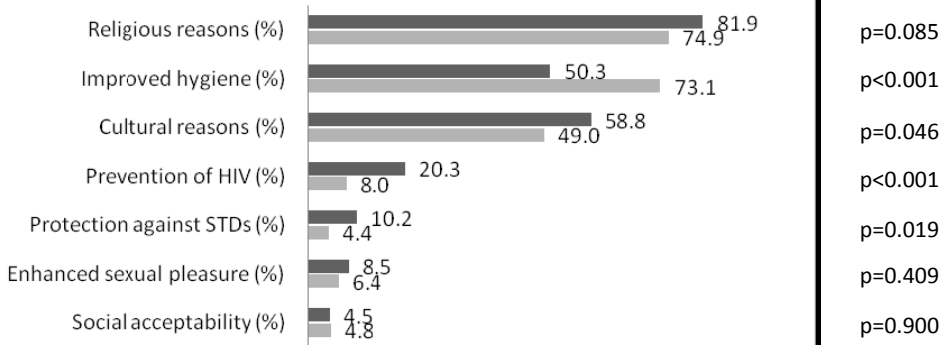

Supplement: MOESM2 [file 9484632]
